# Supplementary material
Source: Research Square preprint supplement (doi:10.21203/rs.3.rs-9939912/v1)
Supplement: Supplementary file 1 [file 6f09de701359ac344cc0e751.pdf]

## Tables

Table 1: Inhibition zones obtained in the agar diffusion assay (halos in mm) and minimum inhibitory concentration (MIC) of the *Streptomyces avermitilis* extract. All results are expressed as mean values and standard deviation (SD).

| Test microorganisms                     | Arithmetic mean and SD | MIC             |
|-----------------------------------------|------------------------|-----------------|
| <i>Staphylococcus aureus</i> ATCC 25923 | 33,5mm ( $\pm$ 2,12)   | 1000 $\mu$ g/mL |
| <i>Staphylococcus aureus</i> ICH 25924  | 27,5mm ( $\pm$ 3,53)   | 1000 $\mu$ g/mL |
| <i>Staphylococcus aureus</i> ATCC 25923 | 29mm ( $\pm$ 1,41)     | 1000 $\mu$ g/mL |
| <i>Staphylococcus aureus</i> ICH 1117   | 34mm ( $\pm$ 1,41)     | 500 $\mu$ g/mL  |
| <i>Staphylococcus aureus</i> ICH 4201   | 31mm ( $\pm$ 0,57)     | 500 $\mu$ g/mL  |
| <i>Staphylococcus aureus</i> ICH 9722   | 31,5mm ( $\pm$ 4,94)   | 250 $\mu$ g/mL  |

Legend: ATCC: American Type Culture Collection / ICH: Clinical Blood Culture Isolate; +/-: positive or negative deviation; mm: millimeter; MIC: Minimum Inhibitory Concentration.
