# Supplementary material
Source: Research Square preprint supplement (doi:10.21203/rs.3.rs-9939912/v1)
Supplement: Supplementary file 2 [file aac6982a115bbb4fdbfa3681.docx]

**Supplementary Data**


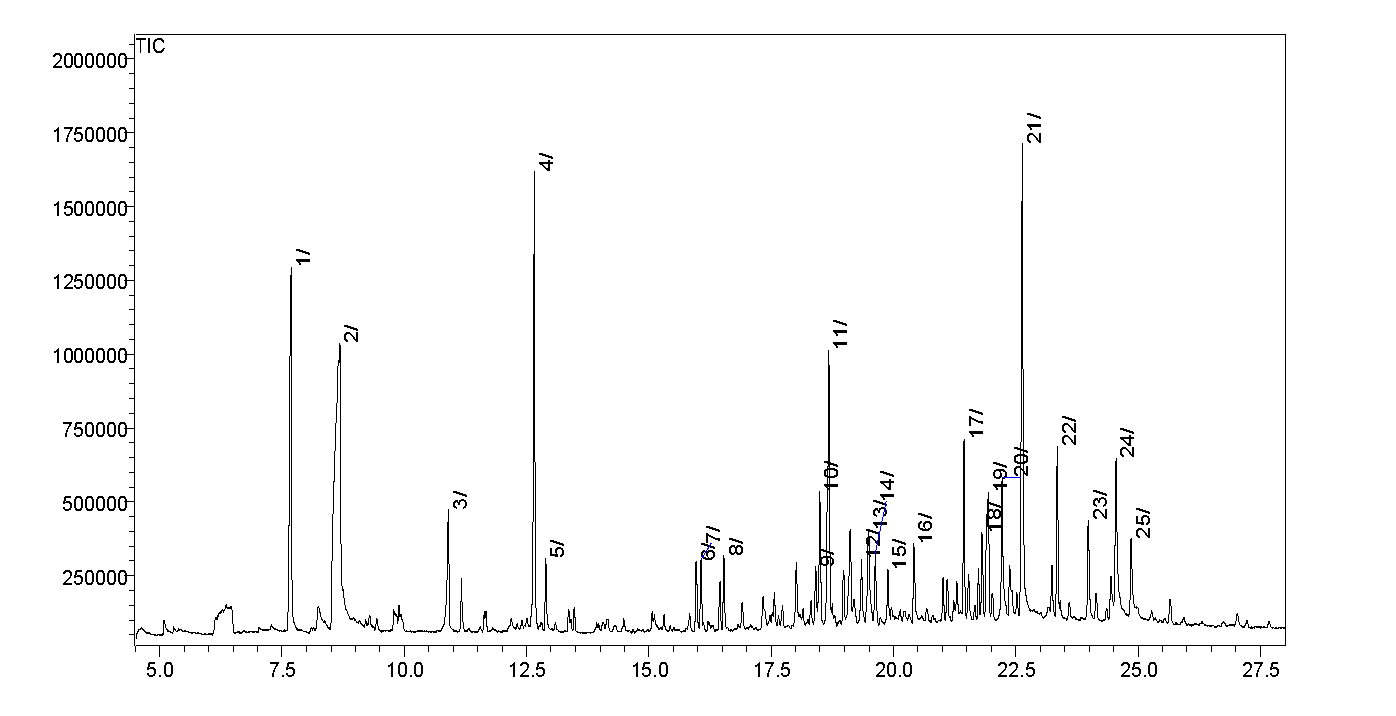


**Fig. 1** – Mass spectrum of compounds present in the EtOAc extract produced by the *Streptomyces avermitilis* strain, showing the main peaks and their respective retention times.

**Table 1:** Analysis based on the Similarity Index of compounds in the secondary metabolite extract of *S. avermitilis* – BIOTECP1C4. Data were obtained from GC-MS chromatography. Reference compounds were obtained from NIST.

| **Nº** | **Similarity Index (SI)** | **Retention Time**  **(Min)** | **Compounds** | **Area (%)** | **Chemical Group** | **Bioactivities** |
| --- | --- | --- | --- | --- | --- | --- |
| 1 | 83 | 7.688 | Oxime, methoxy - phenyl | 9.54 | Oximas aromático | Antimicrobiana  Antifúngica  [[24](https://www.researchgate.net/profile/Saleh-Abu-Lafi/publication/314529904_Isolation_Identification_and_Characterization_of_the_Novel_Antibacterial_Agent_Methoxyphenyl-Oxime_from_Streptomyces_pratensis_QUBC97_Isolate/links/59d62c0daca2725954c7c1ce/Isolation-Identification-and-Characterization-of-the-Novel-Antibacterial-Agent-Methoxyphenyl-Oxime-from-Streptomyces-pratensis-QUBC97-Isolate.pdf), [25](https://doi.org/10.1016/j.scitotenv.2025.179595)] |
| 2 | 90 | 8.686 | Benzaldehyde | 20.23 | Aldeído aromático | Antimicrobiana  Antifúngico  Antioxidante  Anti-inflamatório  [[26](https://doi.org/10.1631/jzus.B2100807), [27](https://doi.org/10.1016/j.jsps.2021.12.012)] |
| 4 | 96 | 12.656 | 2-Methylisoborneol | 8.17 | Monoterpeno oxigenado (álcool terpênico) | Nenhuma atividade encontrada |
| 7 | 90 | 16.070 | trans-1,10-Dimethyl-trans-9-decalinol | 1.27 | Bicíclico terpênico (álcool terpênico) | Nenhuma atividade encontrada |
| 11 | 72 | 18.679 | Apiol. 1,3-Benzodioxole, 4,7-dimethoxy-5-(2-propenyl) | 7.46 | Fenilpropeno metoxilado | Antimicrobiana  Antitumoral  [[28](https://doi.org/10.1177/1934578X20920042), [29](https://doi.org/10.1016/j.ejmech.2004.09.007)] |
| 12 | 83 | 19.347 | Androstan-17-one, 3-ethyl-3-hydroxy-, (5.alpha.) | 1.31 | Esteroide androstanóide. | Antimicrobiana  Anticancer  Antifúngico  [[30,](https://doi.org/10.1016/j.ejmech.2009.04.020) [31](https://doi.org/10.1007/s12010-022-03876-x)] |
| 13 | 82 | 19.493 | 1-Heptatriacotanol | 2.82 | Álcool graxo de cadeia longa | Antimicrobiano  [[32](https://doi.org/10.20546/ijcmas.2020.909.209), [33]](https://doi.org/10.55251/jmbfs.5020) |
| 16 | 91 | 20.420 | Tretadecanoic acid | Ácido mirístico | 1.63 | Ácido graxo saturado | Antimicrobiana  [27](https://doi.org/10.1016/j.jsps.2021.12.012) |
| 17 | 96 | 21.444 | 1,2-Benzenedicarboxylic acid, bis(2-methylpropyl) ester | 3.37 | Éster de ftalato (ftalato de isobutila) | Antimicrobiana  Antioxidante  [[27](https://pmc.ncbi.nlm.nih.gov/articles/PMC9072693/)] |
| 21 | 96 | 22.638 | n-Hexadecanoic acid | Ácido Palmítico | 12.01 | Ácido graxo saturado | Antimicrobiana  Antioxidante  Antibiofilme  [[27](https://pmc.ncbi.nlm.nih.gov/articles/PMC9072693/), [34](https://doi.org/10.1007/s42452-025-06607-z)] |
| 22 | 95 | 23.350 | Isopropyl palmitate | 3.07 | Éster graxo | Nenhuma atividade encontrada |
| 24 | 94 | 24.552 | 9-cis-Oleic acid | Ácido Oleico | 3.68 | Ácido graxo insaturado | Antimicrobiano [[27](https://pmc.ncbi.nlm.nih.gov/articles/PMC9072693/)] |
| 25 | 93 | 24.860 | Octadecanoic acid | Ácido esteárico | 1.76 | Ácido graxo saturado | Antimicrobiana  Antioxidante [[27](https://pmc.ncbi.nlm.nih.gov/articles/PMC9072693/), [34](https://doi.org/10.1007/s42452-025-06607-z)] |
